# Supplementary material for: Intracellular flow cytometric lipid analysis – a multiparametric system to assess distinct lipid classes in live cells
Source: Oxford University Press journal article supplement (doi:10.1242/jcs.258322), 2021-06-11
Supplement: jcs258322supp.pdf [file jcs258322supp.pdf]

**Table S1. List of fatty acids assayed in this study. Peak emission ( $\lambda_{\text{max}}$ ) presented as mean  $\pm$  SEM (n=3).**

| Name                                      | Class             | C atom # | DB # | $\omega$ -pos | Nile Blue $\lambda_{\text{max}}$ 660 nm | Nile Red $\lambda_{\text{max}}$ 575 nm |
|-------------------------------------------|-------------------|----------|------|---------------|-----------------------------------------|----------------------------------------|
| Cholesterol                               | Cholesterol       | 27       | 1    | -             | 171 $\pm$ 4                             | 597 $\pm$ 15                           |
| Cholesteryl linoleate                     | Cholesterol ester | 45       | 2    | -             | 281 $\pm$ 5                             | 989 $\pm$ 22                           |
| Cholesteryl oleate                        | Cholesterol ester | 45       | 3    | -             | 197 $\pm$ 8                             | 1230 $\pm$ 20                          |
| 1-oleoyl-2-sn-2-glycerol                  | Diglyceride       | 37       | 0    | -             | 154 $\pm$ 10                            | 781 $\pm$ 16                           |
| Galactoceramide                           | Phospholipid      | 40       | 1    | -             | 130 $\pm$ 4                             | 200 $\pm$ 14                           |
| Glucosylceramide                          | Phospholipid      | 46       | 1    | -             | 603 $\pm$ 30                            | 2574 $\pm$ 150                         |
| L-a-phosphatidyl choline                  | Phospholipid      | 42       | 2    | -             | 437 $\pm$ 15                            | 1086 $\pm$ 40                          |
| Platelet activating factor (PAF)          | Phospholipid      | 26       | 0    | -             | 451 $\pm$ 50                            | 1244 $\pm$ 53                          |
| Phosphatidyl ethanolamine                 | Phospholipid      | 41       | 2    | -             | 315 $\pm$ 14                            | 155 $\pm$ 6                            |
| Phosphatidyl serine                       | Phospholipid      | 42       | 2    | -             | 480 $\pm$ 30                            | 647 $\pm$ 26                           |
| Phosphatidylinositol (3,4,5)-triphosphate | Phospholipid      | 47       | 4    | -             | 130 $\pm$ 9                             | 40 $\pm$ 2                             |
| Sphingomyelin                             | Phospholipid      | 47       | 2    | -             | 160 $\pm$ 6                             | 322 $\pm$ 22                           |
| Myelin basic protein                      | Protein           | -        | -    | -             | 134 $\pm$ 8                             | 248 $\pm$ 5                            |
| High density lipoprotein                  | Protein           | -        | -    | -             | 1038 $\pm$ 44                           | 1289 $\pm$ 50                          |
| Low density lipoprotein                   | Protein           | -        | -    | -             | 661 $\pm$ 26                            | 2076 $\pm$ 70                          |
| Propionic Acid                            | Saturated         | 3        | 0    | -             | 47 $\pm$ 3                              | 96 $\pm$ 5                             |

|                          |                          |    |   |   |              |              |
|--------------------------|--------------------------|----|---|---|--------------|--------------|
| Glycerol                 | Saturated                | 3  | 0 | - | 111 $\pm$ 5  | 120 $\pm$ 12 |
| O-phosphorylethanolamine | Saturated                | 3  | 0 | - | 100 $\pm$ 5  | 100 $\pm$ 8  |
| Butyric acid             | Saturated                | 4  | 0 | - | 282 $\pm$ 10 | 35 $\pm$ 2   |
| Hexanoic acid            | Saturated                | 6  | 0 | - | 127 $\pm$ 8  | 55 $\pm$ 6   |
| D-galactose              | Saturated                | 6  | 0 | - | 130 $\pm$ 12 | 135 $\pm$ 20 |
| Decanoic acid            | Saturated                | 10 | 0 | - | 52 $\pm$ 2   | 119 $\pm$ 24 |
| Lauric Acid              | Saturated                | 12 | 0 | - | 20 $\pm$ 1   | 10 $\pm$ 1   |
| Myristic acid            | Saturated                | 14 | 0 | - | 18 $\pm$ 2   | 110 $\pm$ 14 |
| Pentadecanoic acid       | Saturated                | 15 | 0 | - | 144 $\pm$ 6  | 154 $\pm$ 19 |
| Palmitic acid            | Saturated                | 16 | 0 | - | 92 $\pm$ 4   | 276 $\pm$ 25 |
| Stearic acid             | Saturated                | 17 | 0 | - | 107 $\pm$ 4  | 103 $\pm$ 10 |
| Heptadecanoic acid       | Saturated                | 17 | 0 | - | 361 $\pm$ 15 | 122 $\pm$ 10 |
| Nonadecanoic acid        | Saturated                | 19 | 0 | - | 37 $\pm$ 2   | 65 $\pm$ 4   |
| Arachidic acid           | Saturated                | 20 | 0 | - | 414 $\pm$ 15 | 53 $\pm$ 4   |
| Heneicosanoic acid       | Saturated                | 21 | 0 | - | 91 $\pm$ 6   | 37 $\pm$ 5   |
| Lignoceric acid          | Saturated                | 24 | 0 | - | 53 $\pm$ 4   | 18 $\pm$ 4   |
| Octanoic acid            | Saturated                | 8  | 0 | - | 14 $\pm$ 1   | 72 $\pm$ 10  |
| Triacetate               | Saturated - triglyceride | 9  | 0 | - | 88 $\pm$ 10  | 120 $\pm$ 11 |
| Tributyrate              | Saturated - triglyceride | 15 | 0 | - | 120 $\pm$ 15 | 164 $\pm$ 14 |

|                     |                          |    |   |   |          |            |
|---------------------|--------------------------|----|---|---|----------|------------|
| Trihexanoate        | Saturated - triglyceride | 21 | 0 | - | 73 ± 9   | 1186 ± 91  |
| Tridecanoate        | Saturated - triglyceride | 33 | 0 | - | 138 ± 12 | 3065 ± 180 |
| Tridodecanoate      | Saturated - triglyceride | 39 | 0 | - | 82 ± 8   | 319 ± 29   |
| Tripalmitate        | Saturated - triglyceride | 51 | 0 | - | 41 ± 3   | 540 ± 33   |
| Tripalmitoleate     | Saturated - triglyceride | 51 | 3 | 7 | 203 ± 17 | 3515 ± 220 |
| Trioleate           | Saturated - triglyceride | 57 | 3 | 9 | 175 ± 19 | 2121 ± 159 |
| Trilinoleate        | Saturated - triglyceride | 57 | 6 | 9 | 70 ± 5   | 1412 ± 144 |
| Oestrogen           | Steroid                  | 18 | 3 | - | 66 ± 4   | 53 ± 3     |
| Estrone             | Steroid                  | 18 | 3 | - | 31 ± 3   | 147 ± 6    |
| Dihydrotestosterone | Steroid                  | 19 | 0 | - | 161 ± 6  | 282 ± 10   |
| Testosterone        | Steroid                  | 19 | 0 | - | 102 ± 4  | 137 ± 8    |
| Corticosterone      | Steroid                  | 21 | 1 | - | 154 ± 5  | 32 ± 2     |
| Deoxycorticosterone | Steroid                  | 21 | 1 | - | 120 ± 5  | 149 ± 9    |
| Progesterone        | Steroid                  | 21 | 1 | - | 76 ± 2   | 147 ± 8    |
| Crotonic acid       | Unsaturated              | 4  | 1 | 2 | 111 ± 9  | 21 ± 1     |
| 7-Octenoic acid     | Unsaturated              | 8  | 1 | 5 | 136 ± 5  | 37 ± 1     |
| 2-Decenoic acid     | Unsaturated              | 10 | 1 | 5 | 90 ± 10  | 50 ± 2     |
| 5-Dodecanoic acid   | Unsaturated              | 12 | 1 | 7 | 71 ± 5   | 117 ± 10   |
| Myristoleic acid    | Unsaturated              | 14 | 1 | 5 | 36 ± 2   | 37 ± 2     |

|                           |                     |    |   |   |           |            |
|---------------------------|---------------------|----|---|---|-----------|------------|
| Palmitoleic acid          | Unsaturated         | 16 | 1 | 7 | 1585 ± 41 | 193 ± 5    |
| Linoleic acid             | Unsaturated         | 18 | 2 | 6 | 1713 ± 67 | 142 ± 9    |
| Oleic acid                | Unsaturated         | 18 | 1 | 9 | 1867 ± 59 | 600 ± 30   |
| α-linolenic acid          | Unsaturated         | 18 | 3 | 6 | 244 ± 22  | 217 ± 15   |
| Cis-vaccenic acid         | Unsaturated         | 18 | 1 | 7 | 1455 ± 35 | 361 ± 19   |
| Arachadonic acid          | Unsaturated         | 20 | 4 | 6 | 1338 ± 29 | 348 ± 22   |
| Eicosenoic acid           | Unsaturated         | 20 | 1 | 9 | 1057 ± 49 | 210 ± 11   |
| Eicosapentanoic acid      | Unsaturated         | 20 | 5 | 3 | 663 ± 25  | 244 ± 14   |
| 1-monooleoyl-rac-glycerol | Unsaturated         | 21 | 1 | 9 | 130 ± 8   | 30 ± 2     |
| Erucic acid               | Unsaturated         | 22 | 1 | 9 | 1650 ± 85 | 335 ± 10   |
| Decosahexanoic acid       | Unsaturated         | 22 | 6 | 3 | 418 ± 45  | 234 ± 11   |
| Anandamide                | Unsaturated         | 22 | 4 | 6 | 178 ± 24  | 525 ± 45   |
| Nervonic acid             | Unsaturated         | 24 | 1 | 9 | 894 ± 37  | 298 ± 29   |
| Palmitelaidic acid        | Unsaturated - trans | 16 | 1 | 7 | 228 ± 11  | 109 ± 4    |
| Elaidic acid              | Unsaturated - trans | 18 | 1 | 9 | 779 ± 38  | 187 ± 14   |
| Linoelaidic acid          | Unsaturated - trans | 18 | 2 | 6 | 529 ± 15  | 62 ± 9     |
| Trans-vaccenic acid       | Unsaturated - trans | 18 | 1 | 7 | 716 ± 18  | 303 ± 16   |
| 11(E)-Eicosenoic acid     | Unsaturated - trans | 20 | 1 | 9 | 360 ± 11  | 91 ± 10    |
| Mineral oil               |                     | -  | - | - | 5 ± 1     | 1237 ± 122 |

**Table S2. Pairwise comparisons of changes in Nile Red fluorescence in the yolk sac across development. P values given, NS = non significant difference.**

| Embryonic day (E) | 10.5 | 11.5 | 12.5 | 13.5 | 14.5    | 15.5    | 16.5    | 17.5    | 18.5    |
|-------------------|------|------|------|------|---------|---------|---------|---------|---------|
| 10.5              |      | NS   | NS   | NS   | <0.0001 | <0.0001 | <0.0001 | <0.0001 | <0.0001 |
| 11.5              |      |      | NS   | NS   | <0.0001 | <0.0001 | <0.0001 | <0.0001 | <0.0001 |
| 12.5              |      |      |      | NS   | <0.0001 | <0.0001 | <0.0001 | <0.0001 | <0.0001 |
| 13.5              |      |      |      |      | <0.0001 | <0.0001 | <0.0001 | <0.0001 | <0.0001 |
| 14.5              |      |      |      |      |         | NS      | NS      | NS      | NS      |
| 15.5              |      |      |      |      |         |         | NS      | NS      | NS      |
| 16.5              |      |      |      |      |         |         |         | NS      | NS      |
| 17.5              |      |      |      |      |         |         |         |         | NS      |
| 18.5              |      |      |      |      |         |         |         |         |         |

**Table S3. Pairwise comparisons of changes in Nile Blue fluorescence in the yolk sac across development. P values given, NS = non significant difference.**

| Embryonic day (E) | 10.5 | 11.5 | 12.5 | 13.5   | 14.5    | 15.5    | 16.5   | 17.5    | 18.5   |
|-------------------|------|------|------|--------|---------|---------|--------|---------|--------|
| 10.5              |      | NS   | NS   | 0.0195 | <0.0001 | <0.0001 | 0.0012 | <0.0001 | NS     |
| 11.5              |      |      | NS   | 0.0261 | <0.0001 | <0.0001 | 0.0018 | <0.0001 | NS     |
| 12.5              |      |      |      | NS     | 0.0111  | 0.0008  | NS     | NS      | NS     |
| 13.5              |      |      |      |        | NS      | 0.0357  | NS     | NS      | NS     |
| 14.5              |      |      |      |        |         | NS      | NS     | NS      | 0.0245 |
| 15.5              |      |      |      |        |         |         | NS     | NS      | 0.0016 |
| 16.5              |      |      |      |        |         |         |        | NS      | NS     |
| 17.5              |      |      |      |        |         |         |        |         | NS     |
| 18.5              |      |      |      |        |         |         |        |         |        |

**Table S4. Principal component analysis correlation matrix for data presented in adult mouse liver SPADE analysis.** Significance (1-tailed): \*  $p < 0.05$ ; \*\*  $p < 0.01$

|             | FSC | SSC     | CD11b   | NR     | PI       | EpCAM   | NB      | F4/80   | VitA    |
|-------------|-----|---------|---------|--------|----------|---------|---------|---------|---------|
| Size        |     | 0.546** | 0.247** | 0.061  | -0.017   | 0.120*  | 0.276** | 0.005   | 0.317** |
| Granularity |     |         | 0.356** | 0.635* | 0.287**  | 0.240** | 0.641** | 0.137*  | 0.844** |
| CD11b       |     |         |         | 0.117* | -0.422** | 0.232** | 0.520** | 0.204** | 0.560** |
| NR          |     |         |         |        | 0.501**  | 0.349** | 0.501** | 0.301** | 0.747** |
| PI          |     |         |         |        |          | 0.202** | 0.231** | -0.013  | 0.255** |
| EpCAM       |     |         |         |        |          |         | 0.367** | 0.614** | 0.366** |
| NB          |     |         |         |        |          |         |         | -0.006  | 0.801** |
| F4/80       |     |         |         |        |          |         |         |         | 0.210** |
| VitA        |     |         |         |        |          |         |         |         |         |

**Table S5. Fluorescently-conjugated antibodies used for multiparametric flow cytometric analyses in the mouse liver.**

| Antibody                 | Fluorophore       | Cat #  | Clone | Source    | Citation                                                                |
|--------------------------|-------------------|--------|-------|-----------|-------------------------------------------------------------------------|
| Anti-mouse F4/80         | APC               | 123115 | BM8   | BioLegend | Schaller, E <i>et al. Mol. Cell. Biol.</i> 22:8035. (2002)              |
| Anti-mouse CD326 (EpCAM) | PerCP/Cyanine 5.5 | 118219 | G8.8/ | BioLegend | Dooley, J <i>et al. J Immunol.</i> 175:4331. (2005).                    |
| Anti-mouse/human CD11b   | FITC              | 101205 | M1/70 | BioLegend | Iwasaki, A and Kelsall, B. L. 2001. <i>J. Immunol.</i> 166:4884 (2001). |

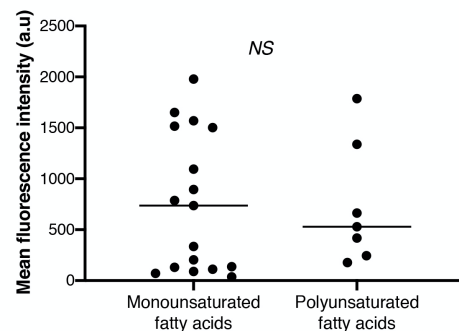

**Figure S1: No differences in Nile Blue fluorescence between mono- and polyunsaturated fatty acids.**

Spectrofluorimetric analyses of unsaturated fatty acids in the presence of Nile Blue comparing mono- and polyunsaturated fatty acids. Fatty acids were reconstituted in DMSO and pipetted onto a 96-well plate at a final concentration of 100  $\mu\text{mol.L}^{-1}$ . Nile Blue was added to a final concentration of 1  $\mu\text{mol.L}^{-1}$  and excited at 620 nm. Emission was collected from 640 to 800 nm. Data presented as mean  $\pm$  SEM (n=3). Significant differences between monounsaturated and polyunsaturated fatty acids were determined by Students *t*-test.

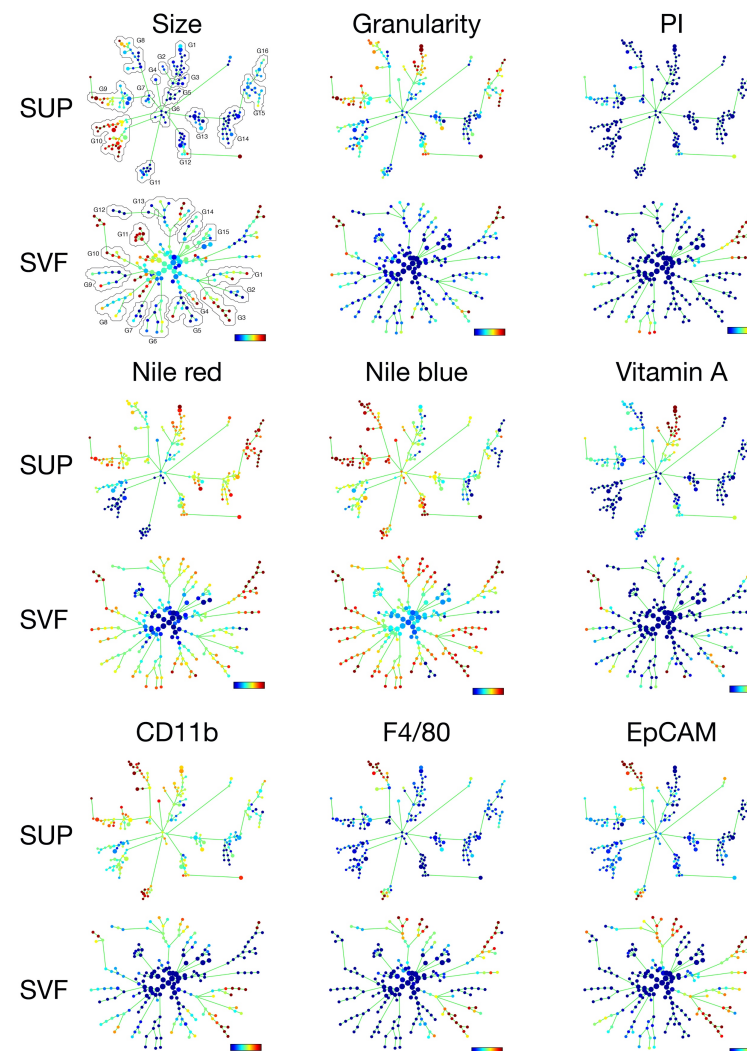

**Figure S2: Multiparametric, flow cytometric analyses of hepatic tissue organised by SPADE plots distinguish clusters of lipid rich populations.**

Spanning-tree Progression Analysis of Density-Normalised Events' (SPADE) analyses were conducted on the buoyant fraction (BF) and stromal vascular fraction (SVF) of dissociated mouse livers stained with Nile Red, Nile Blue, F4/80, EpCAM, CD11b and propidium iodide. Side scatter (granularity), forward scatter (size) and propidium iodide (PI) were also used to build the SPADE tree consisting of a total of 200 nodes. Each node represents a cluster of cells. Blue coloured nodes indicate low levels of fluorescence for the respective marker while red indicates high levels of fluorescence. Clusters of nodes were grouped together according to differences in fluorescence intensity.

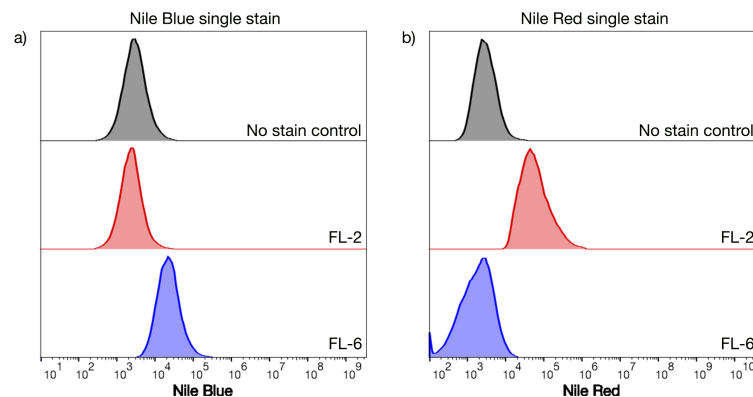

**Figure S3: Nile Blue and Nile Red do not overlap in spectral emission by flow cytometry.** Single cell suspensions of white adipose tissue were generated using the method previously published<sup>16</sup>. Cells of the buoyant fraction were stained with either Nile Blue (a) or Nile Red (b) and fluorescent populations identified. Fluorescent channel (FL) 6 is excited by the 620 nm laser and detects emission at  $660 \pm 20$  nm. Fluorescent channel (FL) 2 is excited by the 488 nm laser and detects emission at  $575 \pm 30$  nm. Nile Blue (blue shaded plot) and Nile Red (red shaded plot) are only detected in the FL-6 and FL-2 respectively. The black shaded plot represents the no-stain control.

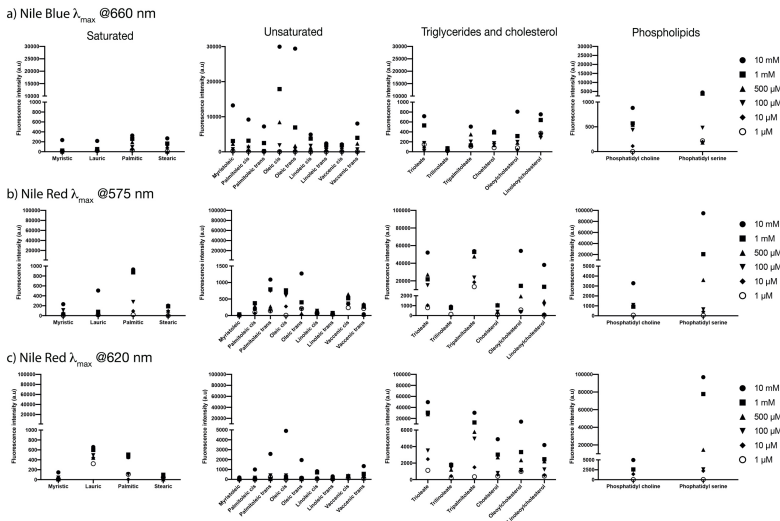

**Figure S4: Increasing lipid concentration elicits greater Nile Blue and Nile Red fluorescence.** Spectrofluorimetric analyses of lipids from multiple classes (saturated and unsaturated free fatty acids, cholesterol, cholesterol esters, triglycerides and phospholipids) were performed in the presence of Nile Blue and Nile Red. A dose-response was performed to determine the relationship between lipid concentration and Nile Blue and Nile Red fluorescence. The concentration of lipids ranged from  $1 \mu\text{M}$  -  $10 \text{ mM}$ . Nile Blue was excited at  $620 \text{ nm}$  while Nile Red was excited at  $488 \text{ nm}$ . Peak emission ( $\lambda_{\text{max}}$ ) for Nile Blue (a) was collected at  $660 \text{ nm}$ ; at  $575 \text{ nm}$  (b) and  $620 \text{ nm}$  (c) for Nile Red.
